# Supplementary material
Source: PubMed Central journal article supplement (PMC2896460)
Supplement: 10_23_Ost_Suppl.pdf [file 10_23_Ost_Suppl.pdf]

## SUPPLEMENTAL INFORMATION

### Attenuated mTOR signaling and enhanced autophagy in adipocytes from obese patients with type 2 diabetes

Anita Öst, Kristoffer Svensson, Iida Ruishalme, Cecilia Brännmark, Niclas Franck, Hans Krook, Per Sandström, Preben Kjølhede, and Peter Strålfors

#### Supplemental Table S1

Clinical characteristics of subjects. BMI, body mass index; TG, fasting plasma concentration of triacylglycerol; ratio of plasma LDL and HDL bound cholesterol; QUICKI, quantitative insulin sensitivity check index (13); nd, not determined.

| Age<br>years | BMI<br>kg/m <sup>2</sup> | Sex | TG<br>mM | LDL/HDL<br>cholesterol | Insulin sensitivity<br>QUICKI |
|--------------|--------------------------|-----|----------|------------------------|-------------------------------|
| 45           | 39.5                     | m   | nd       | nd                     | 0.341                         |
| 51           | 43.7                     | f   | 1.0      | 2.7                    | 0.289                         |
| 35           | 48.8                     | m   | 1.6      | 5.2                    | 0.301                         |
| 46           | 39.1                     | f   | 1.4      | 2.8                    | 0.343                         |
| 60           | 26.8                     | f   | 1.4      | 2.8                    | 0.306                         |
| 62           | 24.4                     | f   | 0.73     | 1.9                    | 0.478                         |
| 43           | 26.5                     | f   | 1.3      | 1.8                    | 0.298                         |
| 51           | 29.0                     | f   | 0.90     | 2.1                    | 0.327                         |
| 40           | 26.7                     | f   | 0.83     | 2.8                    | 0.352                         |
| 40           | 47.7                     | f   | 1.1      | 2.5                    | 0.306                         |
| 49           | 26.0                     | f   | 0.38     | 2.3                    | 0.441                         |
| 71           | 37.6                     | f   | 0.95     | 1.4                    | 0.419                         |
| 21           | 31.2                     | f   | 1.3      | 2.0                    | 0.394                         |
| 43           | 26.7                     | f   | 2.4      | 3.0                    | 0.389                         |
| 58           | 44.0                     | f   | nd       | nd                     | 0.313                         |
| 57           | 25.9                     | f   | 1.0      | 3.9                    | 0.366                         |
| 53           | 22.3                     | f   | 2.9      | 2.3                    | 0.329                         |
| 79           | 28.1                     | f   | 1.1      | 3.5                    | 0.360                         |
| 66           | 27.1                     | f   | 1.1      | 1.8                    | 0.285                         |
| 31           | 27.3                     | f   | 6.0      | nd                     | 0.282                         |
| 37           | 22.3                     | f   | 0.82     | 1.3                    | 0.341                         |
| 70           | 28.9                     | f   | 1.3      | 1.7                    | 0.308                         |
| 70           | 27.9                     | f   | 1.6      | 2.6                    | 0.318                         |
| 76           | 25.1                     | f   | 2.4      | 1.8                    | 0.305                         |
| 67           | 39.7                     | f   | 1.6      | 2.2                    | 0.316                         |
| 74           | 41.0                     | f   | 1.1      | 4.0                    | 0.327                         |

## Supplemental Figure S1

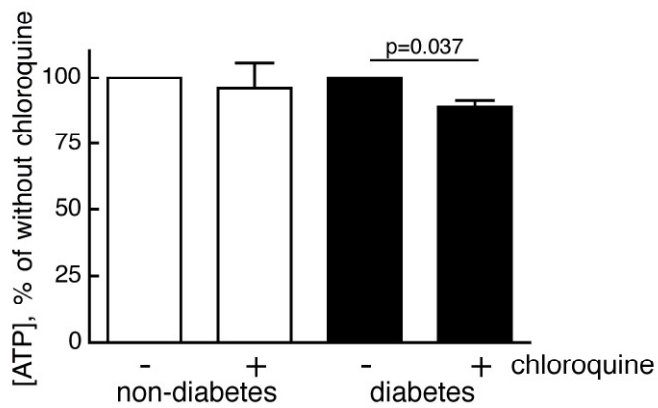

**Figure S1.** Dependence of cellular ATP concentration on autophagy in type 2 diabetes. Adipocytes, from 7 non-diabetic subjects (open bars; age 46-80, average 57.4 yr; BMI 22.9-31.2, average 32.7 kg/m<sup>2</sup>) or 7 diabetic patients (filled bars; age 32-80, average 54.6 yr; BMI 27.5-45.4, average 38.1 kg/m<sup>2</sup>), were incubated with (+) or without (-) 5  $\mu$ M chloroquine, as indicated, in triplicate, for 18 h. Cells were then lysed and the amount of ATP determined with a luciferase based assay. Results are given as the concentration of ATP in percent of controls without chloroquine. Mean $\pm$ SE.
